# Supplementary material for: Quality, topics, and demographic trends of animal systematic reviews - an umbrella review
Source: PubMed Central journal article supplement (PMC11702210; doi:10.1186/s12967-024-05992-0), 2025-01-06
Supplement: 12967_2024_5992_MOESM1_ESM.pdf [file 12967_2024_5992_MOESM1_ESM.pdf]

## Embase session results (27 Jan 2023)

| No. | Query                                                                                                                                                                                                                                                                                                                                                                                                                                                                                                                                                                                                                                                                                                                                                                                                                                                                                                                                                                                                                                                                                                                                                                                                                                                                                                                                                                                                                                                                                                                                                                                                                                                                                                                                                                                                                                                                                                                                                                                                                                                        | Results  |
|-----|--------------------------------------------------------------------------------------------------------------------------------------------------------------------------------------------------------------------------------------------------------------------------------------------------------------------------------------------------------------------------------------------------------------------------------------------------------------------------------------------------------------------------------------------------------------------------------------------------------------------------------------------------------------------------------------------------------------------------------------------------------------------------------------------------------------------------------------------------------------------------------------------------------------------------------------------------------------------------------------------------------------------------------------------------------------------------------------------------------------------------------------------------------------------------------------------------------------------------------------------------------------------------------------------------------------------------------------------------------------------------------------------------------------------------------------------------------------------------------------------------------------------------------------------------------------------------------------------------------------------------------------------------------------------------------------------------------------------------------------------------------------------------------------------------------------------------------------------------------------------------------------------------------------------------------------------------------------------------------------------------------------------------------------------------------------|----------|
| #11 | #3 AND #9 NOT [26-01-2023]/sd                                                                                                                                                                                                                                                                                                                                                                                                                                                                                                                                                                                                                                                                                                                                                                                                                                                                                                                                                                                                                                                                                                                                                                                                                                                                                                                                                                                                                                                                                                                                                                                                                                                                                                                                                                                                                                                                                                                                                                                                                                | 16424    |
| #10 | #3 AND #9                                                                                                                                                                                                                                                                                                                                                                                                                                                                                                                                                                                                                                                                                                                                                                                                                                                                                                                                                                                                                                                                                                                                                                                                                                                                                                                                                                                                                                                                                                                                                                                                                                                                                                                                                                                                                                                                                                                                                                                                                                                    | 16449    |
| #9  | #7 OR #8                                                                                                                                                                                                                                                                                                                                                                                                                                                                                                                                                                                                                                                                                                                                                                                                                                                                                                                                                                                                                                                                                                                                                                                                                                                                                                                                                                                                                                                                                                                                                                                                                                                                                                                                                                                                                                                                                                                                                                                                                                                     | 16669517 |
| #8  | 'animal experiment'/exp OR 'animal model'/exp OR 'experimental animal'/exp OR 'transgenic animal'/exp OR 'male animal'/exp OR 'female animal'/exp OR 'juvenile animal'/exp OR 'animal'/de OR 'chordata'/de OR 'vertebrate'/de OR 'tetrapod'/de OR 'fish'/exp OR 'amniote'/de OR 'amphibia'/exp OR 'mammal'/de OR 'reptile'/exp OR 'sauropsid'/exp OR 'therian'/de OR 'monotremate'/exp OR 'placental mammals'/de OR 'marsupial'/exp OR 'euarchontoglires'/de OR 'afrotheria'/exp OR 'boreoeutheria'/exp OR 'laurasiatheria'/exp OR 'xenarthra'/exp OR 'primate'/de OR 'dermoptera'/exp OR 'glires'/exp OR 'scandentia'/exp OR 'haplorhini'/de OR 'prosimian'/exp OR 'simian'/de OR 'tarsiiform'/exp OR 'catarrhini'/de OR 'platyrrhini'/exp OR 'ape'/de OR 'cercopithecidae'/exp OR 'hominid'/de OR 'hylobatidae'/exp OR 'chimpanzee'/exp OR 'gorilla'/exp OR 'orang utan'/exp OR animal:ab,ti OR animals:ab,ti OR pisces:ab,ti OR fish:ab,ti OR fishes:ab,ti OR catfish:ab,ti OR catfishes:ab,ti OR sheatfish:ab,ti OR silurus:ab,ti OR arius:ab,ti OR heteropneustes:ab,ti OR clarias:ab,ti OR gariepinus:ab,ti OR 'fathead minnow':ab,ti OR 'fathead minnows':ab,ti OR pimephales:ab,ti OR promelas:ab,ti OR cichlidae:ab,ti OR trout:ab,ti OR trouts:ab,ti OR char:ab,ti OR chars:ab,ti OR salvelinus:ab,ti OR salmo:ab,ti OR oncorhynchus:ab,ti OR guppy:ab,ti OR guppies:ab,ti OR millionfish:ab,ti OR poecilia:ab,ti OR goldfish:ab,ti OR goldfishes:ab,ti OR carassius:ab,ti OR auratus:ab,ti OR mullet:ab,ti OR mullets:ab,ti OR mugil:ab,ti OR curema:ab,ti OR shark:ab,ti OR sharks:ab,ti OR cod:ab,ti OR cods:ab,ti OR gadus:ab,ti OR morhua:ab,ti OR carp:ab,ti OR carps:ab,ti OR cyprinus:ab,ti OR carpio:ab,ti OR killifish:ab,ti OR eel:ab,ti OR eels:ab,ti OR anguilla:ab,ti OR zander:ab,ti OR sander:ab,ti OR lucioperca:ab,ti OR stizostedion:ab,ti OR turbot:ab,ti OR turbots:ab,ti OR psetta:ab,ti OR flatfish:ab,ti OR flatfishes:ab,ti OR plaice:ab,ti OR pleuronectes:ab,ti OR platessa:ab,ti OR tilapia:ab,ti OR tilapias:ab,ti OR | 8545662  |

oreochromis:ab,ti OR sarotherodon:ab,ti OR 'common sole':ab,ti OR 'dover sole':ab,ti OR solea:ab,ti OR zebrafish:ab,ti OR zebrafishes:ab,ti OR danio:ab,ti OR rerio:ab,ti OR seabass:ab,ti OR dicentrarchus:ab,ti OR labrax:ab,ti OR morone:ab,ti OR lamprey:ab,ti OR lampreys:ab,ti OR petromyzon:ab,ti OR pumpkinseed:ab,ti OR pumpkinseeds:ab,ti OR lepomis:ab,ti OR gibbosus:ab,ti OR herring:ab,ti OR clupea:ab,ti OR harengus:ab,ti OR amphibia:ab,ti OR amphibian:ab,ti OR amphibians:ab,ti OR anura:ab,ti OR salientia:ab,ti OR frog:ab,ti OR frogs:ab,ti OR rana:ab,ti OR toad:ab,ti OR toads:ab,ti OR bufo:ab,ti OR xenopus:ab,ti OR laevis:ab,ti OR bombina:ab,ti OR epidalea:ab,ti OR calamita:ab,ti OR salamander:ab,ti OR salamanders:ab,ti OR newt:ab,ti OR newts:ab,ti OR triturus:ab,ti OR reptilia:ab,ti OR reptile:ab,ti OR reptiles:ab,ti OR 'bearded dragon':ab,ti OR pogona:ab,ti OR vitticeps:ab,ti OR iguana:ab,ti OR iguanas:ab,ti OR lizard:ab,ti OR lizards:ab,ti OR 'anguis fragilis':ab,ti OR turtle:ab,ti OR turtles:ab,ti OR snakes:ab,ti OR snake:ab,ti OR aves:ab,ti OR bird:ab,ti OR birds:ab,ti OR quail:ab,ti OR quails:ab,ti OR coturnix:ab,ti OR bobwhite:ab,ti OR colinus:ab,ti OR virginianus:ab,ti OR poultry:ab,ti OR poultries:ab,ti OR fowl:ab,ti OR fowls:ab,ti OR chicken:ab,ti OR chickens:ab,ti OR gallus:ab,ti OR 'zebra finch':ab,ti OR taeniopygia:ab,ti OR guttata:ab,ti OR canary:ab,ti OR canaries:ab,ti OR serinus:ab,ti OR canaria:ab,ti OR parakeet:ab,ti OR parakeets:ab,ti OR grasskeet:ab,ti OR parrot:ab,ti OR parrots:ab,ti OR psittacine:ab,ti OR psittacines:ab,ti OR shelduck:ab,ti OR tadorna:ab,ti OR goose:ab,ti OR geese:ab,ti OR branta:ab,ti OR leucopsis:ab,ti OR woodlark:ab,ti OR lullula:ab,ti OR flycatcher:ab,ti OR ficedula:ab,ti OR hypoleuca:ab,ti OR dove:ab,ti OR doves:ab,ti OR geopelia:ab,ti OR cuneata:ab,ti OR duck:ab,ti OR ducks:ab,ti OR greylag:ab,ti OR graylag:ab,ti OR anser:ab,ti OR harrier:ab,ti OR 'circus pygargus':ab,ti OR 'red knot':ab,ti OR 'great knot':ab,ti OR calidris:ab,ti OR canutus:ab,ti OR godwit:ab,ti OR limosa:ab,ti OR lapponica:ab,ti OR meleagris:ab,ti OR gallopavo:ab,ti OR jackdaw:ab,ti OR corvus:ab,ti OR monedula:ab,ti OR ruff:ab,ti OR philomachus:ab,ti OR pugnax:ab,ti OR lapwing:ab,ti OR peewit:ab,ti OR plover:ab,ti OR vanellus:ab,ti OR swan:ab,ti OR cygnus:ab,ti OR columbianus:ab,ti OR bewickii:ab,ti OR gull:ab,ti OR chroicocephalus:ab,ti OR ridibundus:ab,ti OR albifrons:ab,ti OR 'great tit':ab,ti OR parus:ab,ti OR aythya:ab,ti OR fuligula:ab,ti OR streptopelia:ab,ti OR risoria:ab,ti OR spoonbill:ab,ti OR platalea:ab,ti OR leucorodia:ab,ti OR blackbird:ab,ti OR turdus:ab,ti OR merula:ab,ti OR 'blue tit':ab,ti OR cyanistes:ab,ti OR pigeon:ab,ti OR pigeons:ab,ti OR columba:ab,ti OR pintail:ab,ti OR anas:ab,ti OR starling:ab,ti OR sturnus:ab,ti OR owl:ab,ti OR 'athene noctua':ab,ti OR pochard:ab,ti OR ferina:ab,ti OR cockatiel:ab,ti OR nymphicus:ab,ti OR hollandicus:ab,ti OR skylark:ab,ti OR alauda:ab,ti OR tern:ab,ti OR sterna:ab,ti OR teal:ab,ti OR crecca:ab,ti OR oystercatcher:ab,ti OR haematopus:ab,ti OR ostralegus:ab,ti OR shrew:ab,ti OR shrews:ab,ti OR sorex:ab,ti OR araneus:ab,ti OR crocidura:ab,ti OR russula:ab,ti OR 'european mole':ab,ti OR

talpa:ab,ti OR chiroptera:ab,ti OR bat:ab,ti OR bats:ab,ti OR eptesicus:ab,ti OR serotinus:ab,ti OR myotis:ab,ti OR dasynceme:ab,ti OR daubentonii:ab,ti OR pipistrelle:ab,ti OR pipistrellus:ab,ti OR cat:ab,ti OR cats:ab,ti OR felis:ab,ti OR catus:ab,ti OR feline:ab,ti OR dog:ab,ti OR dogs:ab,ti OR canis:ab,ti OR canine:ab,ti OR canines:ab,ti OR otter:ab,ti OR otters:ab,ti OR lutra:ab,ti OR badger:ab,ti OR badgers:ab,ti OR meles:ab,ti OR fitchew:ab,ti OR fitch:ab,ti OR foumart:ab,ti OR foulmart:ab,ti OR ferrets:ab,ti OR ferret:ab,ti OR polecat:ab,ti OR polecats:ab,ti OR mustela:ab,ti OR putorius:ab,ti OR weasel:ab,ti OR weasels:ab,ti OR fox:ab,ti OR foxes:ab,ti OR vulpes:ab,ti OR 'common seal':ab,ti OR phoca:ab,ti OR vitulina:ab,ti OR 'grey seal':ab,ti OR halichoerus:ab,ti OR horse:ab,ti OR horses:ab,ti OR equus:ab,ti OR equine:ab,ti OR equidae:ab,ti OR donkey:ab,ti OR donkeys:ab,ti OR mule:ab,ti OR mules:ab,ti OR pig:ab,ti OR pigs:ab,ti OR swine:ab,ti OR swines:ab,ti OR hog:ab,ti OR hogs:ab,ti OR boar:ab,ti OR boars:ab,ti OR porcine:ab,ti OR piglet:ab,ti OR piglets:ab,ti OR sus:ab,ti OR scrofa:ab,ti OR llama:ab,ti OR llamas:ab,ti OR lama:ab,ti OR glama:ab,ti OR deer:ab,ti OR deers:ab,ti OR cervus:ab,ti OR elaphus:ab,ti OR cow:ab,ti OR cows:ab,ti OR 'bos taurus':ab,ti OR 'bos indicus':ab,ti OR bovine:ab,ti OR bull:ab,ti OR bulls:ab,ti OR cattle:ab,ti OR bison:ab,ti OR bisons:ab,ti OR sheep:ab,ti OR sheeps:ab,ti OR 'ovis aries':ab,ti OR ovine:ab,ti OR lamb:ab,ti OR lambs:ab,ti OR mouflon:ab,ti OR mouflons:ab,ti OR goat:ab,ti OR goats:ab,ti OR capra:ab,ti OR caprine:ab,ti OR chamois:ab,ti OR rupicapra:ab,ti OR leporidae:ab,ti OR lagomorpha:ab,ti OR lagomorph:ab,ti OR rabbit:ab,ti OR rabbits:ab,ti OR oryctolagus:ab,ti OR cuniculus:ab,ti OR laprine:ab,ti OR hares:ab,ti OR lepus:ab,ti OR rodentia:ab,ti OR rodent:ab,ti OR rodents:ab,ti OR murinae:ab,ti OR mouse:ab,ti OR mice:ab,ti OR mus:ab,ti OR musculus:ab,ti OR murine:ab,ti OR woodmouse:ab,ti OR apodemus:ab,ti OR rat:ab,ti OR rats:ab,ti OR rattus:ab,ti OR norvegicus:ab,ti OR 'guinea pig':ab,ti OR 'guinea pigs':ab,ti OR cavia:ab,ti OR porcellus:ab,ti OR hamster:ab,ti OR hamsters:ab,ti OR mesocricetus:ab,ti OR cricetus:ab,ti OR gerbil:ab,ti OR gerbils:ab,ti OR jird:ab,ti OR jirds:ab,ti OR meriones:ab,ti OR unguiculatus:ab,ti OR jerboa:ab,ti OR jerboas:ab,ti OR jaculus:ab,ti OR chinchilla:ab,ti OR chinchillas:ab,ti OR beaver:ab,ti OR beavers:ab,ti OR 'castor fiber':ab,ti OR 'castor canadensis':ab,ti OR sciuridae:ab,ti OR squirrel:ab,ti OR squirrels:ab,ti OR sciurus:ab,ti OR chipmunk:ab,ti OR chipmunks:ab,ti OR marmot:ab,ti OR marmots:ab,ti OR marmota:ab,ti OR suslik:ab,ti OR susliks:ab,ti OR spermophilus:ab,ti OR cynomys:ab,ti OR cottonrat:ab,ti OR cottonrats:ab,ti OR sigmodon:ab,ti OR vole:ab,ti OR voles:ab,ti OR microtus:ab,ti OR myodes:ab,ti OR glareolus:ab,ti OR primate:ab,ti OR primates:ab,ti OR prosimian:ab,ti OR prosimians:ab,ti OR lemur:ab,ti OR lemurs:ab,ti OR lemuridae:ab,ti OR loris:ab,ti OR 'bush baby':ab,ti OR 'bush babies':ab,ti OR bushbaby:ab,ti OR bushbabies:ab,ti OR galago:ab,ti OR galagos:ab,ti OR anthropoidea:ab,ti OR anthropoids:ab,ti OR simian:ab,ti OR

simians:ab,ti OR monkey:ab,ti OR monkeys:ab,ti OR marmoset:ab,ti OR marmosets:ab,ti OR callithrix:ab,ti OR cebuella:ab,ti OR tamarin:ab,ti OR tamarins:ab,ti OR saguinus:ab,ti OR leontopithecus:ab,ti OR 'squirrel monkey':ab,ti OR 'squirrel monkeys':ab,ti OR saimiri:ab,ti OR 'night monkey':ab,ti OR 'night monkeys':ab,ti OR 'owl monkey':ab,ti OR 'owl monkeys':ab,ti OR douroucoulis:ab,ti OR aotus:ab,ti OR 'spider monkey':ab,ti OR 'spider monkeys':ab,ti OR ateles:ab,ti OR baboon:ab,ti OR baboons:ab,ti OR papio:ab,ti OR 'rhesus monkey':ab,ti OR macaque:ab,ti OR macaca:ab,ti OR mulatta:ab,ti OR cynomolgus:ab,ti OR fascicularis:ab,ti OR 'green monkey':ab,ti OR 'green monkeys':ab,ti OR chlorocebus:ab,ti OR vervet:ab,ti OR vervets:ab,ti OR pygerythrus:ab,ti OR hominoidea:ab,ti OR ape:ab,ti OR apes:ab,ti OR hylobatidae:ab,ti OR gibbon:ab,ti OR gibbons:ab,ti OR siamang:ab,ti OR siamangs:ab,ti OR nomascus:ab,ti OR symphalangus:ab,ti OR hominidae:ab,ti OR orangutan:ab,ti OR orangutans:ab,ti OR pongo:ab,ti OR chimpanzee:ab,ti OR chimpanzees:ab,ti OR 'pan troglodytes':ab,ti OR bonobo:ab,ti OR bonobos:ab,ti OR 'pan paniscus':ab,ti OR gorilla:ab,ti OR gorillas:ab,ti OR troglodytes:ab,ti

|    |                                                                                                                                                                                                                                                                                                                                                            |          |
|----|------------------------------------------------------------------------------------------------------------------------------------------------------------------------------------------------------------------------------------------------------------------------------------------------------------------------------------------------------------|----------|
| #7 | 'preclinical study'/de OR 'animal experiment'/exp OR 'in vitro study'/exp OR 'nonhuman'/exp OR (((cell OR tissue OR organ) NEAR/12 (culture* OR experiment* OR stud* OR model* OR line)):ti,ab,kw) OR cell:de OR preclinical:ti,ab,kw OR 'pre clinical':ti,ab,kw OR 'in vitro':ti,ab,kw OR 'ex vivo':ti,ab,kw OR nonhuman:ti,ab,kw OR 'non human':ti,ab,kw | 13930347 |
| #6 | #3 AND #4 NOT [26-01-2023]/sd                                                                                                                                                                                                                                                                                                                              | 69886    |
| #5 | #3 AND #4                                                                                                                                                                                                                                                                                                                                                  | 69968    |
| #4 | 'human'/exp NOT (((((cell OR tissue OR organ) NEAR/12 (culture* OR experiment* OR stud* OR model* OR line)):ti,ab,kw) OR cell:de OR preclinical:ti,ab,kw OR 'pre clinical':ti,ab,kw OR 'in vitro':ti,ab,kw OR 'ex vivo':ti,ab,kw)                                                                                                                          | 20632755 |
| #3 | #1 AND #2 NOT [conference abstract]/lim AND [english]/lim                                                                                                                                                                                                                                                                                                  | 81649    |
| #2 | 'meta analysis'/exp OR 'systematic review'/exp OR (systematic:ti AND review*:ti) OR (meta:ti AND analys*:ti) OR metaanalys*:ti OR 'meta analys*':ti                                                                                                                                                                                                        | 574257   |
| #1 | 'neurologic disease'/exp OR 'neuroscience'/exp OR neuroscien*:ti,kw OR neuroanatom*:ti,kw OR neurobiolog*:ti,kw OR neurochemi*:ti,kw OR                                                                                                                                                                                                                    | 4731853  |

neuroeconomic\*:ti,kw OR neuroendocrin\*:ti,kw OR neurolog\*:ti,kw OR  
neuropatholog\*:ti,kw OR neuropharmacolog\*:ti,kw OR neurophysiolog\*:ti,kw OR  
neuropsychiatr\*:ti,kw OR neuropsych\*:ti,kw OR psychiatr\*:ti,kw OR  
neurotraumatolog\*:ti,kw

---

Copyright © 2023 Elsevier Limited except certain content provided by third parties.

Embase is a trade mark of Elsevier Life Sciences IP Limited.

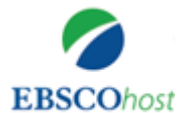

Thursday, January 26, 2023 3:14:51 PM

| #   | Query                                                                                                                                                                                                                                                                                                                                                                                                                                                                                                                                                                                                                                      | Limiters/Expanders                                                                                                    | Last Run Via                                                                                            | Results    |
|-----|--------------------------------------------------------------------------------------------------------------------------------------------------------------------------------------------------------------------------------------------------------------------------------------------------------------------------------------------------------------------------------------------------------------------------------------------------------------------------------------------------------------------------------------------------------------------------------------------------------------------------------------------|-----------------------------------------------------------------------------------------------------------------------|---------------------------------------------------------------------------------------------------------|------------|
| S12 | S3 AND S10                                                                                                                                                                                                                                                                                                                                                                                                                                                                                                                                                                                                                                 | Limiters - English Language<br>Expanders - Apply<br>equivalent subjects<br>Search modes - Find all my<br>search terms | Interface - EBSCOhost Research<br>Databases<br>Search Screen - Advanced<br>Search<br>Database - MEDLINE | 3,666      |
| S11 | S3 AND S10                                                                                                                                                                                                                                                                                                                                                                                                                                                                                                                                                                                                                                 | Expanders - Apply<br>equivalent subjects<br>Search modes - Find all my<br>search terms                                | Interface - EBSCOhost Research<br>Databases<br>Search Screen - Advanced<br>Search<br>Database - MEDLINE | 3,723      |
| S10 | S8 OR S9                                                                                                                                                                                                                                                                                                                                                                                                                                                                                                                                                                                                                                   | Expanders - Apply<br>equivalent subjects<br>Search modes - Find all my<br>search terms                                | Interface - EBSCOhost Research<br>Databases<br>Search Screen - Advanced<br>Search<br>Database - MEDLINE | 10,520,662 |
| S9  | (MH "animal<br>experimentation+" OR MH<br>"models, animal+" OR MH<br>"invertebrates+" OR MH<br>"Animals" OR MH "animal<br>population groups+" OR MH<br>"chordata" OR MH<br>"chordata, nonvertebrate+"<br>OR MH "vertebrates" OR<br>MH "amphibians+" OR MH<br>"birds+" OR MH "fishes+"<br>OR MH "reptiles+" OR MH<br>"mammals" OR MH<br>"primates" OR MH<br>"artiodactyla+" OR MH<br>"carnivora+" OR MH<br>"cetacea+" OR MH<br>"chiroptera+" OR MH<br>"elephants+" OR MH<br>"hyraxes+" OR MH<br>"insectivora+" OR MH<br>"lagomorpha+" OR MH<br>"marsupialia+" OR MH<br>"monotremata+" OR MH<br>"perissodactyla+" OR MH<br>"rodentia+" OR MH | Expanders - Apply<br>equivalent subjects<br>Search modes - Find all my<br>search terms                                | Interface - EBSCOhost Research<br>Databases<br>Search Screen - Advanced<br>Search<br>Database - MEDLINE | 7,673,120  |

"scandentia+" OR MH  
"sirenia+" OR MH  
"xenarthra+" OR MH  
"haplorhini" OR MH  
"strepsirhini+" OR MH  
"platyrrhini+" OR MH  
"tarsii+" OR MH "catarrhini"  
OR MH "cercopithecidae+"  
OR MH "hylobatidae+" OR  
MH "hominidae" OR MH  
"gorilla gorilla+" OR MH  
"pan paniscus+" OR MH  
"pan troglodytes+" OR MH  
"pongo pygmaeus+")OR  
((TI(animals OR animal OR  
mice OR mus OR mouse  
OR murine OR woodmouse  
OR rats OR rat OR murinae  
OR muridae OR cottonrat  
OR cottonrats OR hamster  
OR hamsters OR cricetinae  
OR rodentia OR rodent OR  
rodents OR pigs OR pig OR  
swine OR swines OR piglets  
OR piglet OR boar OR  
boars OR "sus scrofa" OR  
ferrets OR ferret OR polecat  
OR polecats OR "mustela  
putorius" OR "guinea pigs"  
OR "guinea pig" OR cavia  
OR callithrix OR marmoset  
OR marmosets OR cebuella  
OR hapale OR octodon OR  
chinchilla OR chinchillas OR  
gerbillinae OR gerbil OR  
gerbils OR jird OR jirds OR  
merione OR meriones OR  
rabbits OR rabbit OR hares  
OR hare OR diptera OR  
flies OR fly OR dipteral OR  
drosophila OR drosophilidae  
OR cats OR cat OR carus  
OR felis OR nematoda OR  
nematode OR nematodes  
OR sipunculida OR dogs  
OR dog OR canine OR  
canines OR canis OR sheep  
OR sheeps OR mouflon OR  
mouflons OR ovis OR goats

OR goat OR capra OR  
capras OR rupicapra OR  
rupicapras OR chamois OR  
haplorhini OR monkey OR  
monkeys OR anthropoidea  
OR anthropoids OR  
saguinus OR tamarin OR  
tamarins OR leontopithecus  
OR hominidae OR ape OR  
apes OR "pan paniscus" OR  
bonobo OR bonobos OR  
"pan troglodytes" OR gibbon  
OR gibbons OR siamang  
OR siamangs OR nomascus  
OR symphalangus OR  
chimpanzee OR  
chimpanzees OR prosimian  
OR prosimians OR "bush  
baby" OR bush babies OR  
galagos OR galago OR  
pongidae OR gorilla OR  
gorillas OR "pongo  
pygmaeus" OR orangutan  
OR orangutans OR lemur  
OR lemurs OR lemuridae  
OR horse OR horses OR  
equus OR cow OR calf OR  
bull OR chicken OR  
chickens OR gallus OR  
quail OR bird OR birds OR  
quails OR poultry OR  
poultres OR fowl OR fowls  
OR reptile OR reptilia OR  
reptiles OR snakes OR  
snake OR lizard OR lizards  
OR alligator OR alligators  
OR crocodile OR crocodiles  
OR turtle OR turtles OR  
amphibian OR amphibians  
OR amphibia OR frog OR  
frogs OR bombina OR  
salientia OR toad OR toads  
OR "epidalea calamita" OR  
salamander OR  
salamanders OR eel OR  
eels OR fish OR fishes OR  
pisces OR catfish OR  
catfishes OR siluriformes  
OR arius OR



heteropneustes OR  
sheatfish OR perch OR  
perches OR percidae OR  
perca OR trout OR trouts  
OR char OR chars OR  
salvelinus OR minnow OR  
cyprinidae OR carps OR  
carp OR zebrafish OR  
zebrafishes OR goldfish OR  
goldfishes OR guppy OR  
guppies OR chub OR chubs  
OR tinca OR barbels OR  
barbus OR pimephales OR  
promelas OR "poecilia  
reticulata" OR mullet OR  
mulletts OR eel OR eels OR  
seahorse OR seahorses OR  
mugil curema OR atlantic  
cod OR shark OR sharks  
OR catshark OR anguilla  
OR salmonid OR salmonids  
OR whitefish OR whitefishes  
OR salmon OR salmons OR  
sole OR solea OR lamprey  
OR lampreys OR  
pumpkinseed OR sunfish  
OR sunfishes OR tilapia OR  
tilapias OR turbot OR  
turbotts OR flatfish OR  
flatfishes OR sciuridae OR  
squirrel OR squirrels OR  
chipmunk OR chipmunks  
OR suslik OR susliks OR  
vole OR voles OR lemming  
OR lemmings OR muskrat  
OR muskrats OR lemmus  
OR otter OR otters OR  
marten OR martens OR  
martes OR weasel OR  
badger OR badgers OR  
ermine OR mink OR minks  
OR sable OR sables OR  
gulo OR gulos OR wolverine  
OR wolverines OR mustela  
OR llama OR llamas OR  
alpaca OR alpacas OR  
camelid OR camelids OR  
guanaco OR guanacos OR  
chiroptera OR chiropteras

OR bat OR bats OR fox OR  
foxes OR iguana OR  
iguanas OR xenopus laevis  
OR parakeet OR parakeets  
OR parrot OR parrots OR  
donkey OR donkeys OR  
mule OR mules OR zebra  
OR zebras OR shrew OR  
shrews OR bison OR bisons  
OR buffalo OR buffaloes OR  
deer OR deers OR bear OR  
bears OR panda OR pandas  
OR "wild hog" OR "wild  
boar" OR fitchew OR fitch  
OR beaver OR beavers OR  
jerboa OR jerboas OR  
capybara OR capybaras)  
OR AB(animals OR animal  
OR mice OR mus OR  
mouse OR murine OR  
woodmouse OR rats OR rat  
OR murinae OR muridae  
OR cottonrat OR cottonrats  
OR hamster OR hamsters  
OR cricetinae OR rodentia  
OR rodent OR rodents OR  
pigs OR pig OR swine OR  
swines OR piglets OR piglet  
OR boar OR boars OR "sus  
scrofa" OR ferrets OR ferret  
OR polecat OR polecats OR  
"mustela putorius" OR  
"guinea pigs" OR "guinea  
pig" OR cavia OR callithrix  
OR marmoset OR  
marmosets OR cebuella OR  
hapale OR octodon OR  
chinchilla OR chinchillas OR  
gerbillinae OR gerbil OR  
gerbils OR jird OR jirds OR  
merione OR meriones OR  
rabbits OR rabbit OR hares  
OR hare OR diptera OR  
flies OR fly OR dipteral OR  
drosophila OR drosophilidae  
OR cats OR cat OR carus  
OR felis OR nematoda OR  
nematode OR nematodes  
OR sipunculida OR dogs

OR dog OR canine OR  
canines OR canis OR sheep  
OR sheeps OR mouflon OR  
mouflons OR ovis OR goats  
OR goat OR capra OR  
capras OR rupicapra OR  
rupicapras OR chamois OR  
haplorhini OR monkey OR  
monkeys OR anthropoidea  
OR anthropoids OR  
saguinus OR tamarin OR  
tamarins OR leontopithecus  
OR hominidae OR ape OR  
apes OR "pan paniscus" OR  
bonobo OR bonobos OR  
"pan troglodytes" OR gibbon  
OR gibbons OR siamang  
OR siamangs OR nomascus  
OR symphalangus OR  
chimpanzee OR  
chimpanzees OR prosimian  
OR prosimians OR "bush  
baby" OR bush babies OR  
galagos OR galago OR  
pongidae OR gorilla OR  
gorillas OR "pongo  
pygmaeus" OR orangutan  
OR orangutans OR lemur  
OR lemurs OR lemuridae  
OR horse OR horses OR  
equus OR cow OR calf OR  
bull OR chicken OR  
chickens OR gallus OR  
quail OR bird OR birds OR  
quails OR poultry OR  
poultres OR fowl OR fowls  
OR reptile OR reptilia OR  
reptiles OR snakes OR  
snake OR lizard OR lizards  
OR alligator OR alligators  
OR crocodile OR crocodiles  
OR turtle OR turtles OR  
amphibian OR amphibians  
OR amphibia OR frog OR  
frogs OR bombina OR  
salientia OR toad OR toads  
OR "epidalea calamita" OR  
salamander OR  
salamanders OR eel OR

eels OR fish OR fishes OR  
pisces OR catfish OR  
catfishes OR siluriformes  
OR arius OR  
heteropneustes OR  
sheatfish OR perch OR  
perches OR percidae OR  
perca OR trout OR trouts  
OR char OR chars OR  
salvelinus OR minnow OR  
cyprinidae OR carps OR  
carp OR zebrafish OR  
zebrafishes OR goldfish OR  
goldfishes OR guppy OR  
guppies OR chub OR chubs  
OR tinca OR barbels OR  
barbus OR pimephales OR  
promelas OR "poecilia  
reticulata" OR mullet OR  
mulletts OR eel OR eels OR  
seahorse OR seahorses OR  
mugil curema OR atlantic  
cod OR shark OR sharks  
OR catshark OR anguilla  
OR salmonid OR salmonids  
OR whitefish OR whitefishes  
OR salmon OR salmons OR  
sole OR solea OR lamprey  
OR lampreys OR  
pumpkinseed OR sunfish  
OR sunfishes OR tilapia OR  
tilapias OR turbot OR  
turbots OR flatfish OR  
flatfishes OR sciuridae OR  
squirrel OR squirrels OR  
chipmunk OR chipmunks  
OR suslik OR susliks OR  
vole OR voles OR lemming  
OR lemmings OR muskrat  
OR muskrats OR lemmus  
OR otter OR otters OR  
marten OR martens OR  
martes OR weasel OR  
badger OR badgers OR  
ermine OR mink OR minks  
OR sable OR sables OR  
gulo OR gulos OR wolverine  
OR wolverines OR mustela  
OR llama OR llamas OR

alpaca OR alpacas OR  
 camelid OR camelids OR  
 guanaco OR guanacos OR  
 chiroptera OR chiropteras  
 OR bat OR bats OR fox OR  
 foxes OR iguana OR  
 iguanas OR xenopus laevis  
 OR parakeet OR parakeets  
 OR parrot OR parrots OR  
 donkey OR donkeys OR  
 mule OR mules OR zebra  
 OR zebras OR shrew OR  
 shrews OR bison OR bisons  
 OR buffalo OR buffaloes OR  
 deer OR deers OR bear OR  
 bears OR panda OR pandas  
 OR "wild hog" OR "wild  
 boar" OR fitchew OR fitch  
 OR beaver OR beavers OR  
 jerboa OR jerboas OR  
 capybara OR capybaras))  
 NOT SB medline)

|    |                                                                                                                                                                                                                                                                                                                                                                                                                                                  |                                                                                                                 |                                                                                                   |           |
|----|--------------------------------------------------------------------------------------------------------------------------------------------------------------------------------------------------------------------------------------------------------------------------------------------------------------------------------------------------------------------------------------------------------------------------------------------------|-----------------------------------------------------------------------------------------------------------------|---------------------------------------------------------------------------------------------------|-----------|
| S8 | (MH "Animal Experimentation+") OR (MH "In Vitro Techniques+") OR TI ((cell OR tissue OR organ) N12 (culture* OR experiment* OR stud* OR model* OR line)) OR AB ((cell OR tissue OR organ) N12 (culture* OR experiment* OR stud* OR model* OR line)) OR MW (cell) OR TI (preclinical OR pre-clinical OR "in vitro" OR "ex vivo" OR nonhuman OR non-human) OR AB (preclinical OR pre-clinical OR "in vitro" OR "ex vivo" OR nonhuman OR non-human) | Expanders - Apply equivalent subjects<br>Search modes - Find all my search terms                                | Interface - EBSCOhost Research Databases<br>Search Screen - Advanced Search<br>Database - MEDLINE | 5,780,172 |
| S7 | S4 NOT S5                                                                                                                                                                                                                                                                                                                                                                                                                                        | Limiters - English Language<br>Expanders - Apply equivalent subjects<br>Search modes - Find all my search terms | Interface - EBSCOhost Research Databases<br>Search Screen - Advanced Search<br>Database - MEDLINE | 46,535    |
| S6 | S4 NOT S5                                                                                                                                                                                                                                                                                                                                                                                                                                        | Expanders - Apply equivalent subjects                                                                           | Interface - EBSCOhost Research Databases                                                          | 47,659    |

|    |                                                                                                                                                                                                                                                                                                                                 |                                                                                                      |                                                                                                   |           |
|----|---------------------------------------------------------------------------------------------------------------------------------------------------------------------------------------------------------------------------------------------------------------------------------------------------------------------------------|------------------------------------------------------------------------------------------------------|---------------------------------------------------------------------------------------------------|-----------|
|    |                                                                                                                                                                                                                                                                                                                                 | Search modes - Find all my search terms                                                              | Search Screen - Advanced Search<br>Database - MEDLINE                                             |           |
| S5 | (TI ((cell OR tissue OR organ) N12 (culture* OR experiment* OR stud* OR model* OR line)) OR AB ((cell OR tissue OR organ) N12 (culture* OR experiment* OR stud* OR model* OR line)) OR MW (cell) OR TI (preclinical OR pre-clinical OR "in vitro" OR "ex vivo") OR AB (preclinical OR pre-clinical OR "in vitro" OR "ex vivo")) | Expanders - Apply equivalent subjects<br>Search modes - Find all my search terms                     | Interface - EBSCOhost Research Databases<br>Search Screen - Advanced Search<br>Database - MEDLINE | 5,501,189 |
| S4 | S1 AND S2                                                                                                                                                                                                                                                                                                                       | Limiters - Human<br>Expanders - Apply equivalent subjects<br>Search modes - Find all my search terms | Interface - EBSCOhost Research Databases<br>Search Screen - Advanced Search<br>Database - MEDLINE | 49,586    |
| S3 | S1 AND S2                                                                                                                                                                                                                                                                                                                       | Expanders - Apply equivalent subjects<br>Search modes - Find all my search terms                     | Interface - EBSCOhost Research Databases<br>Search Screen - Advanced Search<br>Database - MEDLINE | 52,764    |
| S2 | PT ("systematic review" OR meta-analysis) OR TI ((systematic AND review*) OR (meta AND analys*) OR metaanalys* OR meta-analys*)                                                                                                                                                                                                 | Expanders - Apply equivalent subjects<br>Search modes - Find all my search terms                     | Interface - EBSCOhost Research Databases<br>Search Screen - Advanced Search<br>Database - MEDLINE | 369,445   |
| S1 | (MH "Nervous System Diseases+") OR (MH "Neurosciences+") OR TI (neuroscien* OR neuroanatom* OR neurobiolog* OR neurochemi* OR neuroeconomic* OR neuroendocrin* OR neurolog* OR neuropatholog* OR neuropharmacolog* OR neurophysiolog* OR neuropsychiatr* OR                                                                     | Expanders - Apply equivalent subjects<br>Search modes - Find all my search terms                     | Interface - EBSCOhost Research Databases<br>Search Screen - Advanced Search<br>Database - MEDLINE | 3,402,266 |

neuropsych\* OR psychiatr\*  
OR neurotraumatolog\*) OR  
AB (neuroscien\* OR  
neuroanatom\* OR  
neurobiolog\* OR  
neurochemi\* OR  
neuroeconomic\* OR  
neuroendocrin\* OR  
neurolog\* OR  
neuropatholog\* OR  
neuropharmacolog\* OR  
neurophysiolog\* OR  
neuropsychiatr\* OR  
neuropsych\* OR psychiatr\*  
OR neurotraumatolog\*)
